# Supplementary material for: Suppression of GPR56 expression by pyrrole-imidazole polyamide represents a novel therapeutic drug for AML with high EVI1 expression
Source: PubMed Central journal article supplement (PMC6137133; doi:10.1038/s41598-018-32205-8), 2018-09-13
Supplement: 41598_2018_32205_MOESM1_ESM.pdf [file 41598_2018_32205_MOESM1_ESM.pdf]

1  
2  
3  
4 **Suppression of *GPR56* expression by pyrrole-imidazole polyamide represents a novel**  
5 **therapeutic drug for AML with high *EVI1* expression.**  
6

7 Hasi Rani Saha<sup>1,4</sup>, Kazuko Kaneda-Nakashima<sup>1,4</sup>, Shunsuke Shimosaki<sup>1</sup>, Akira Suekane<sup>1</sup>, Bidhan  
8 Sarkar<sup>1</sup>, Yusuke Saito<sup>1</sup>, Honami Ogoh<sup>1</sup>, Shingo Nakahata<sup>1</sup>, Kentaro Inoue<sup>2</sup>, Takayoshi Watanabe<sup>3</sup>,  
9 Hiroki Nagase<sup>3</sup>, Kazuhiro Morishita<sup>1</sup>

10 <sup>1</sup>Division of Tumor and Cellular Biochemistry, Department of Medical Science, University of  
11 Miyazaki, Miyazaki, Japan

12 <sup>2</sup>Department of Computer Science and Systems Engineering, University of Miyazaki, Miyazaki,  
13 Japan

14 <sup>3</sup>Division of Innovative Cancer Therapeutics, Chiba Cancer Center Research Institute, Chiba, Japan

15 <sup>4</sup>Equal contribution of the first two authors

16  
17 Corresponding should be addressed to: Kazuhiro Morishita, MD. Ph.D.

18 Division of Tumor and Cellular Biochemistry, Department of Medical Sciences, Faculty of Medicine,  
19 University of Miyazaki 5200 Kihara, Kiyotake, Miyazaki, Miyazaki, Japan

20 Phone: +81-985-85-0985 Fax: +81-985-85-2401

21 E-mail: kmorishi@med.miyazaki-u.ac.jp  
22

23 Supplementary Information includes:

- 24 • Supplementary Materials and methods
  - 25 • Supplementary Tables (Table S1 and Table S2)
  - 26 • Supplementary Figures (Figure S1 to S5)
  - 27 • Supplementary References
- 28  
29

1 **Supplementary Materials and methods**

2  
3

4 **Cell proliferation assay**

5 UCSD/AML1 and Kasumi-3 cells were seeded on 12-well plates at a density of  $1 \times 10^5$  cells per well  
6 and cultured at 37°C in 5% CO<sub>2</sub>. The tested PIP compounds were added at a concentration of 1 μM  
7 and number of viable cells were counted every 24 hours by the trypan blue exclusion method.

8

9 **Flow cytometry (FCM) analysis**

10 For analysis of cell surface expression of GPR56, cells were incubated with phycoerythrin  
11 (PE)-conjugated anti-human GPR56 antibody (Clone: CG4, BioLegend, San Diego, CA, USA) in  
12 FCM buffer [phosphate buffered saline (PBS), 0.5% BSA, and 2 mM EDTA] on ice for 30 minutes,  
13 washed twice with FCM buffer and analyzed by a JSAN cell sorter (Bay bioscience, Kobe, Japan).  
14 For apoptotic cell analysis, cells were incubated with AnnexinV-FITC (BioLegend) and DAPI in  
15 Annexin V binding buffer at room temperature for 15 minutes and analyzed by FCM. For detecting  
16 infiltration of USCD/AML1 in immunodeficient Balb/c-RJ mice, cell populations from different  
17 tissues were incubated with PE-CD45 (Clone: HI30, BioLegend) on ice for 20 minutes, washed  
18 twice with FCM buffer and analyzed by FCM. Cell cycle analysis was performed by a BrdU  
19 labelling kit (BD Pharmingen, San Jose, CA, USA) according to the manufacturer's protocol. All the  
20 data were analyzed using Flow Jo software version 8.7.

21

22 **Western blotting**

23 Cells were lysed in NP-40 lysis buffer (50 mM Tris-HCl, pH8.0, 150 mM NaCl, 5 mM EDTA, 1%  
24 NP-40) supplemented with a proteinase inhibitor cocktail (Sigma-Aldrich, St. Louis, MO, USA) and  
25 phosphatase inhibitor tablet (PhosStop, Roche, Indianapolis, IN, USA), subjected to  
26 SDS-polyacrylamide gel electrophoresis, and transferred to a PVDF membrane (Millipore, Billerica,

1 MA, USA). The membranes was incubated with primary antibodies overnight at 4°C, washed with  
2 PBS containing 0.1% Tween 20, incubated with horseradish peroxidase-conjugated to either  
3 anti-rabbit IgG or anti-mouse IgG (Invitrogen, Carlsbad, CA, USA) for 3 hours at room temperature,  
4 and visualized by Lumi-Light (Roche). The primary antibodies used were as follows: anti-p53 (Ab-6;  
5 EMD Biosciences, San Diego, CA, USA), anti-MDM2 (sc-965; Santa Cruz Biotechnology, Santa  
6 Cruz, CA, USA), anti-p21 waf1/cip1 (#2946; Cell Signaling Technology, Danvers, MA, USA),  
7 anti-p27 Kip1 (#2552; Cell Signaling Technology), anti-caspase-3 (# 9661; Cell Signaling  
8 Technology), anti-GPR56 (sc-99089; Santa Cruz Biotechnology), and anti-β-actin (A5441;  
9 Sigma-Aldrich).

10

#### 11 **Colony forming assay**

12 Human CD34<sup>+</sup> progenitor cells from cord blood, single donor was purchased from Promo cell  
13 (Heidelberg, Germany) (C-12921, #411Z021) and maintained in stem span II media (Stem cell  
14 technologies, Vancouver, Canada) for two to three days; then, 1,000 cells were plated in 1 ml of  
15 human Methocult H4034 Optimum media (Stem cell technologies) in 35mm culture dishes and  
16 cultured in the presence or absence of PI polyamides (1 μM). The number of colonies was counted  
17 under an inverted microscope on day 14.

18 For mouse c-kit<sup>+</sup> HSC colony assay, 8-12 week old C57BL6 mice bone marrow cells was  
19 isolated and separated by AUTOMACS (Miltenyi Biotec, Gladbach, Germany) by using biotin  
20 anti-mouse CD117 (Bio Legend, # 105803) and Anti-Biotin Microbeads (Miltenyi Biotec). Then  
21 cells was maintained for two days in stem span II medium then plated and counted colonies  
22 according to our previous report<sup>1</sup>.

23

#### 24 **Subcutaneous mouse xenograft model of AML**

25 Six-week-old Balb/c-RJ female mice were bred and maintained under specific pathogen-free

1 conditions.  $5 \times 10^6$  UCSD/AML1 cells in 100  $\mu$ l of PBS (-) free from calcium and magnesium ions  
2 were mixed with the same volume of Matrigel (cat#356230, BD Sciences, San Jose, CA, USA), and  
3 subcutaneously transplanted to Balb/c-RJ mice. The tumor volumes were calculated from the  
4 measurements according to the following formula:  $V = (L \times W \times H)/2$ , where V is tumor volume, W  
5 is tumor width (mm), L is tumor length (mm), and H is tumor height (mm).

6

#### 7 **Intravenous mouse xenograft model of AML**

8  $5 \times 10^6$  UCSD/AML1 cells in 100  $\mu$ l of PBS (-) were injected into the vein of a Balb/c-RJ mice as  
9 previously described<sup>2</sup>. Each group contained five mice. For the analysis of bone marrow profile, bone  
10 marrow cells of mice were collected and filtered through a cell strainer (cat#352340, BD Sciences).  
11 After red blood cells were removed from bone marrow cell suspension using red blood cell lysis  
12 solution (cat#555899, BD Sciences),  $1 \times 10^6$  cells were stained with the following antibodies:  
13 Myeloid: CD11b-APC (BioLegend 101212) and Gr1-PE (BioLegend 108408), Erythroid:  
14 TER119-APC (BioLegend 116262), Megakaryoid: CD61-PE (BioLegend 104308), B cell: CD19-PE  
15 (BioLegend 115508), B220-APC (BioLegend 103212), T cell: CD3e-APC (BioLegend 100312). The  
16 cells were then washed with FCM buffer and analyzed on a BD FACS Calibur (BD Biosciences).

17

#### 18 **In vivo treatment of PIPs**

19 PIP/56-1 or PIP/AP-2 and the solvent of PIPs (6% DMSO) as controls were injected into the  
20 BALB/c-RJ mice either intravenously or subcutaneously transplanted with UCSD/AML1 at 1 mg/kg  
21 via the tail vein once a week for 4 weeks and tumor volume and survival rate were evaluated as  
22 above.

23

#### 24 **Plasmids**

25 The human GPR56 expression vector, pCMV5-GPR56<sup>3</sup>, was a kind gift from Dr. H. Itoh (Nara

1 Institute of Science and Technology, Japan). The construction of pLKO.1 hygromycin vector for  
 2 (Addgene, Cambridge, MA, USA) p53 shRNA was described elsewhere<sup>4</sup>.

3

4 **Statistical analysis**

5 Data are presented as the mean  $\pm$  S.D. Student's *t*-test, and log-rank test were used for statistical  
 6 analysis. *P* values of less than 0.05 were regarded as statistically significant.

7

8

9 **Supplementary Table S1. Summary of the characteristics of AML leukemia cells with *EVII* and**  
 10 ***GPR56* expression status and chromosomal abnormalities**

11

| Patient number | Chromosomal rearrangements | Classification | EVII expression | GPR56 expression |
|----------------|----------------------------|----------------|-----------------|------------------|
| P1             | inv(3)(q21;q26)            | AML            | high            | high             |
| P2             | t(3;21)(q26;q22)           | AML            | high            | high             |
| P3             | monosomy 7                 | AML            | low             | low              |
| P4             | monosomy 7                 | AML            | low             | low              |

12

13

14

15 **Supplementary Table S2. List of primers used for quantitative RT-PCR, ChIP PCR and gel**  
 16 **mobility shift assay**

17

18

**Quantitative RT-PCR**

| Gene name | Primer  | Sequence (5'→3')           | Species |
|-----------|---------|----------------------------|---------|
| BCLXL     | Forward | GATCCCCATGGCAGCAGTAAAGCAAG | Human   |
|           | Reverse | CCCCATCCCGGAAGAGTTCATTCCT  |         |
| CKMT1     | Forward | AGCAGGAATGGCTCGAGAC        | Human   |
|           | Reverse | ATCCTCCTCATTACCCAGATC      |         |
| GATA2     | Forward | GTCCTGACGGAGAGCATGA        | Human   |
|           | Reverse | GCCTTCTGAACAGGAACGAG       |         |
| RUNX1     | Forward | CTGCCCATCGCTTTCAAGGT       | Human   |

|               |         |                        |       |
|---------------|---------|------------------------|-------|
|               | Reverse | ACTTCGACCGACAAACCTGAG  |       |
| TFRC          | Forward | CTCACTTTTAGACAATGCTGC  | Human |
|               | Reverse | CTCATGACGCGATCATTGAG   |       |
| GAPDH         | Forward | CCAGCAAGAGCACAAAGAGGAA | Human |
|               | Reverse | CAAGGGGTCTACATGGCAACT  |       |
| 18srRNA       | Forward | GGCCCTGTAATTGGAATGAGTC | Human |
|               | Reverse | CCAAGATCCAACCTACGAGCTT |       |
| ANGPT1        | Forward | GATGCTCCACACGTGGAACC   | Human |
|               | Reverse | GCATTCTGCTGTATCTGGGC   |       |
| MPL           | Forward | AGCCTGGATCTCCTTGGTGAC  | Human |
|               | Reverse | ACCGCCAGTCTCCTGCCT     |       |
| Evi1          | Forward | AACCATGTGTTTGGGGAAAA   | Mouse |
|               | Reverse | AGCTTCAAGCGGGTCAGTTA   |       |
| $\beta$ Actin | Forward | TTCCTTCTTGGGTATGGAAT   | Mouse |
|               | Reverse | GAGCAATGATCTTGATCTTC   |       |
| Gpr56         | Forward | ACGTGGGCTGTGTCATCTC    | Mouse |
|               | Reverse | GGACTTTGATGGTGTAGTCACG |       |

1  
2  
3

### ChIP PCR

| Name           |         | Sequence (5'→3')      | Species |
|----------------|---------|-----------------------|---------|
| GPR56 promoter | Forward | CATGTCAATGTTGGGTGCCA  | Human   |
|                | Reverse | AGGCCTCAACTCAAATGTCCC |         |

4  
5  
6

### Gel mobility shift assay

| Name       |         | Sequence (5' to 3')                                 |                            |
|------------|---------|-----------------------------------------------------|----------------------------|
| matched    | Forward | TGATGGATACGGAAGATAATTTTAA                           | Alexa Fluor<br>488-labeled |
|            | Reverse | TTAAAATTATCTTCCGTATCCATCA                           |                            |
| mismatched | Forward | TGATGGATACG <u>T</u> A <u>A</u> TATAATTTTAA         | Alexa Fluor<br>488-labeled |
|            | Forward | TTAAAATTAT <u>A</u> <u>T</u> T <u>A</u> CGTATCCATCA |                            |

7  
8  
9

The substituted nucleotides in EVI1-binding site are indicated by underlines.

Figure S1

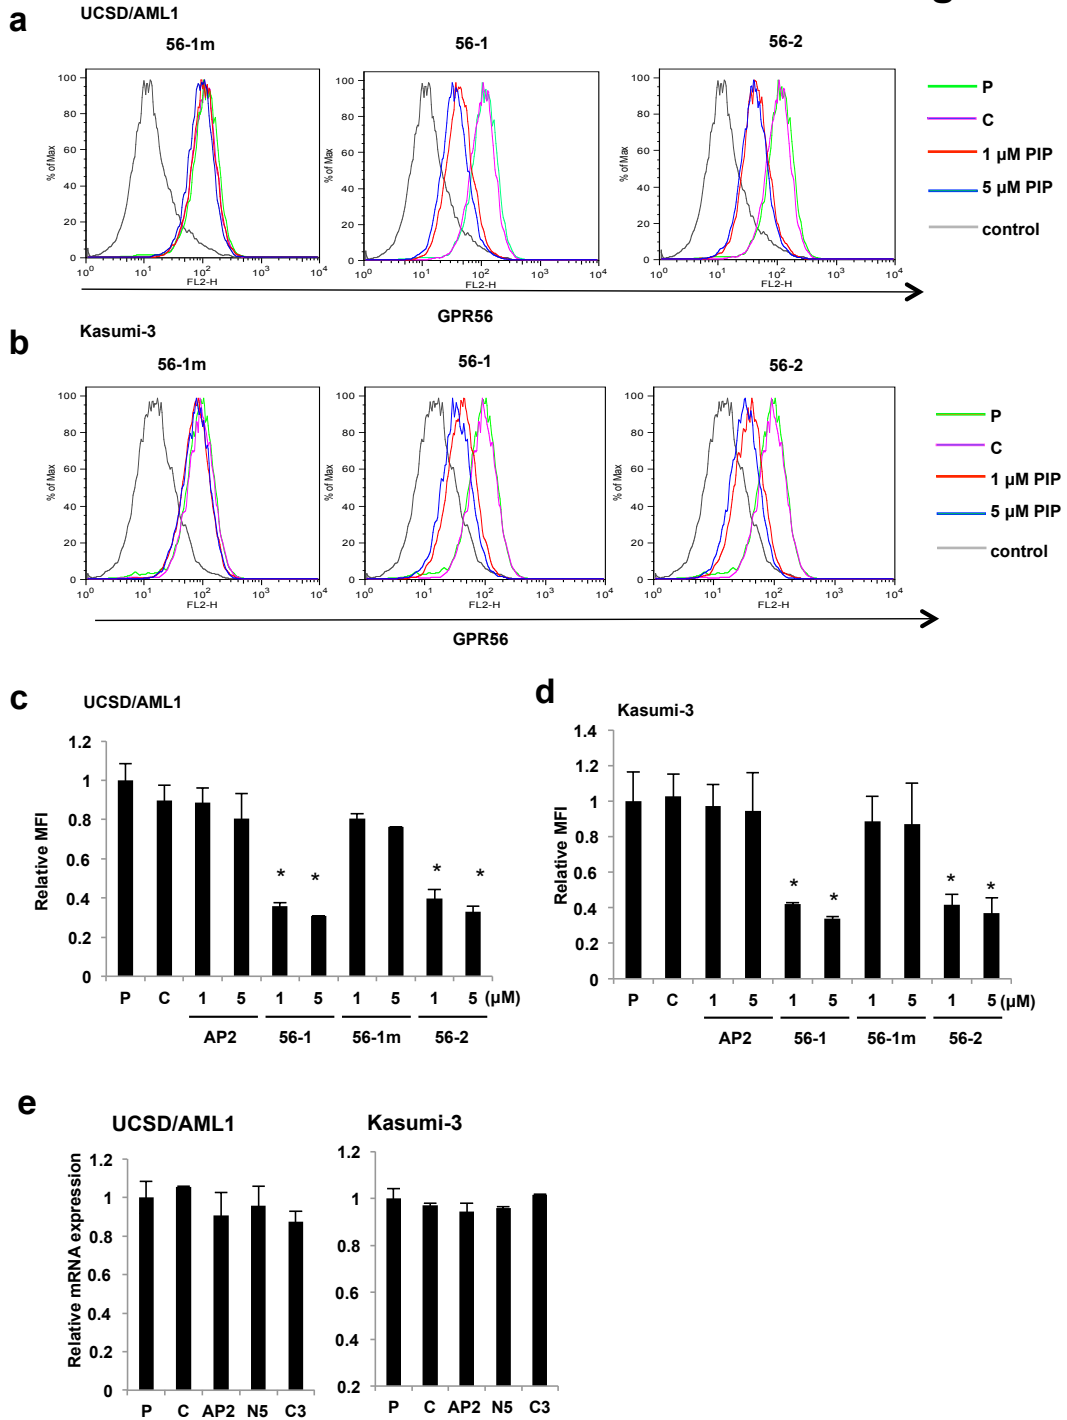

Figure S1

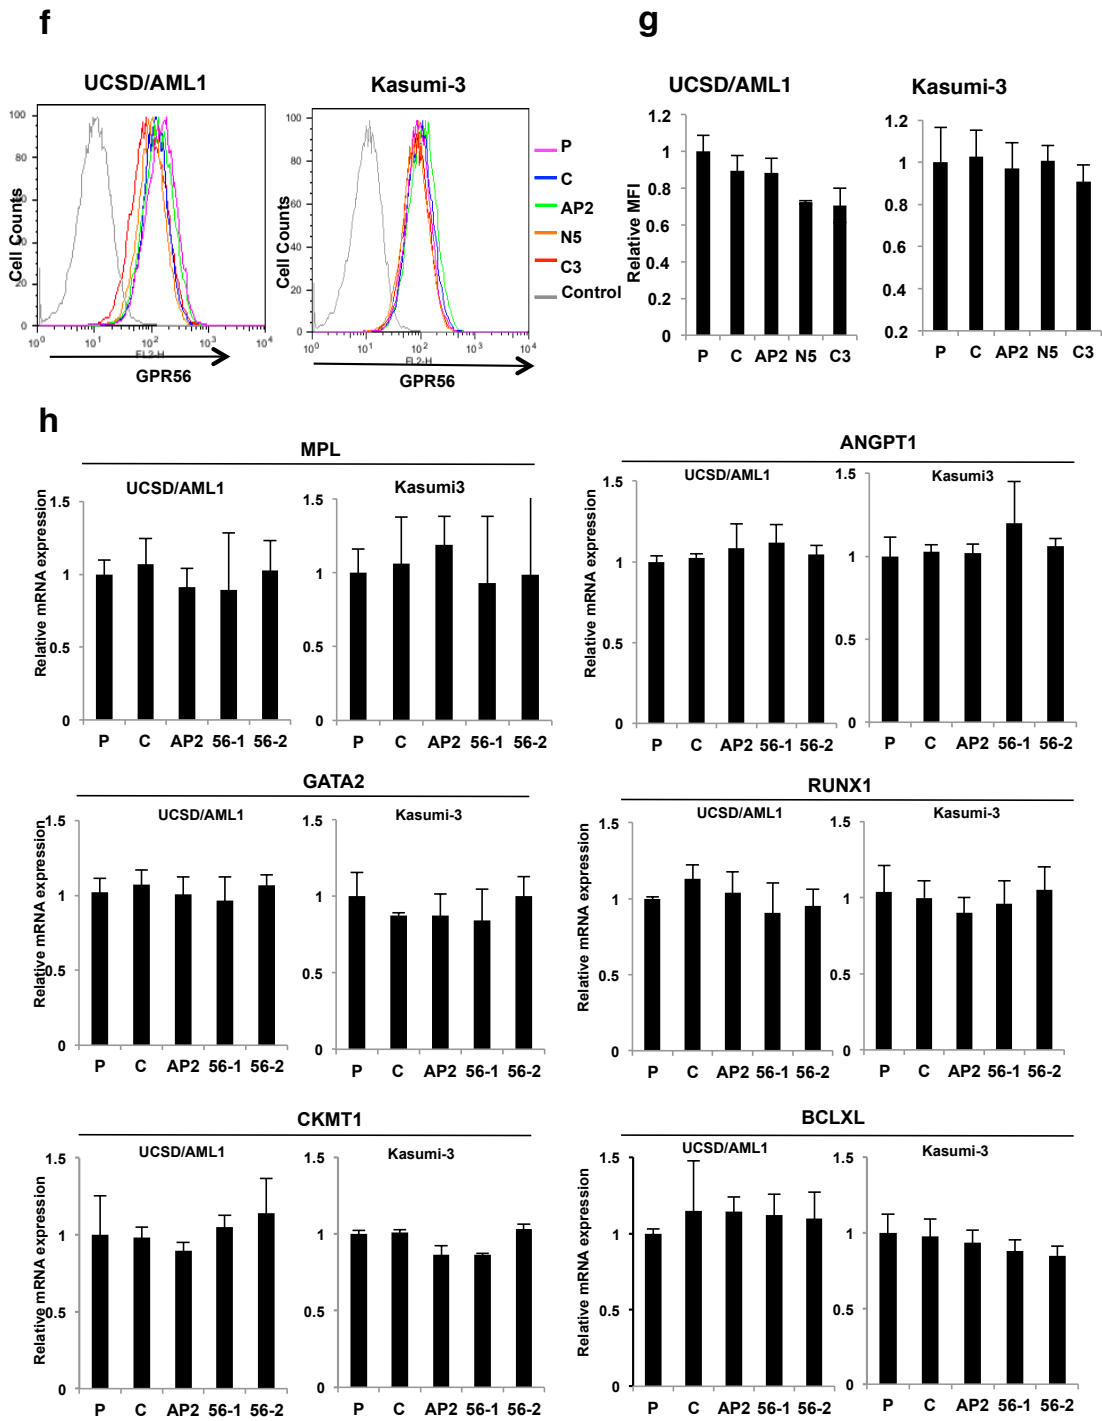



Figure S1

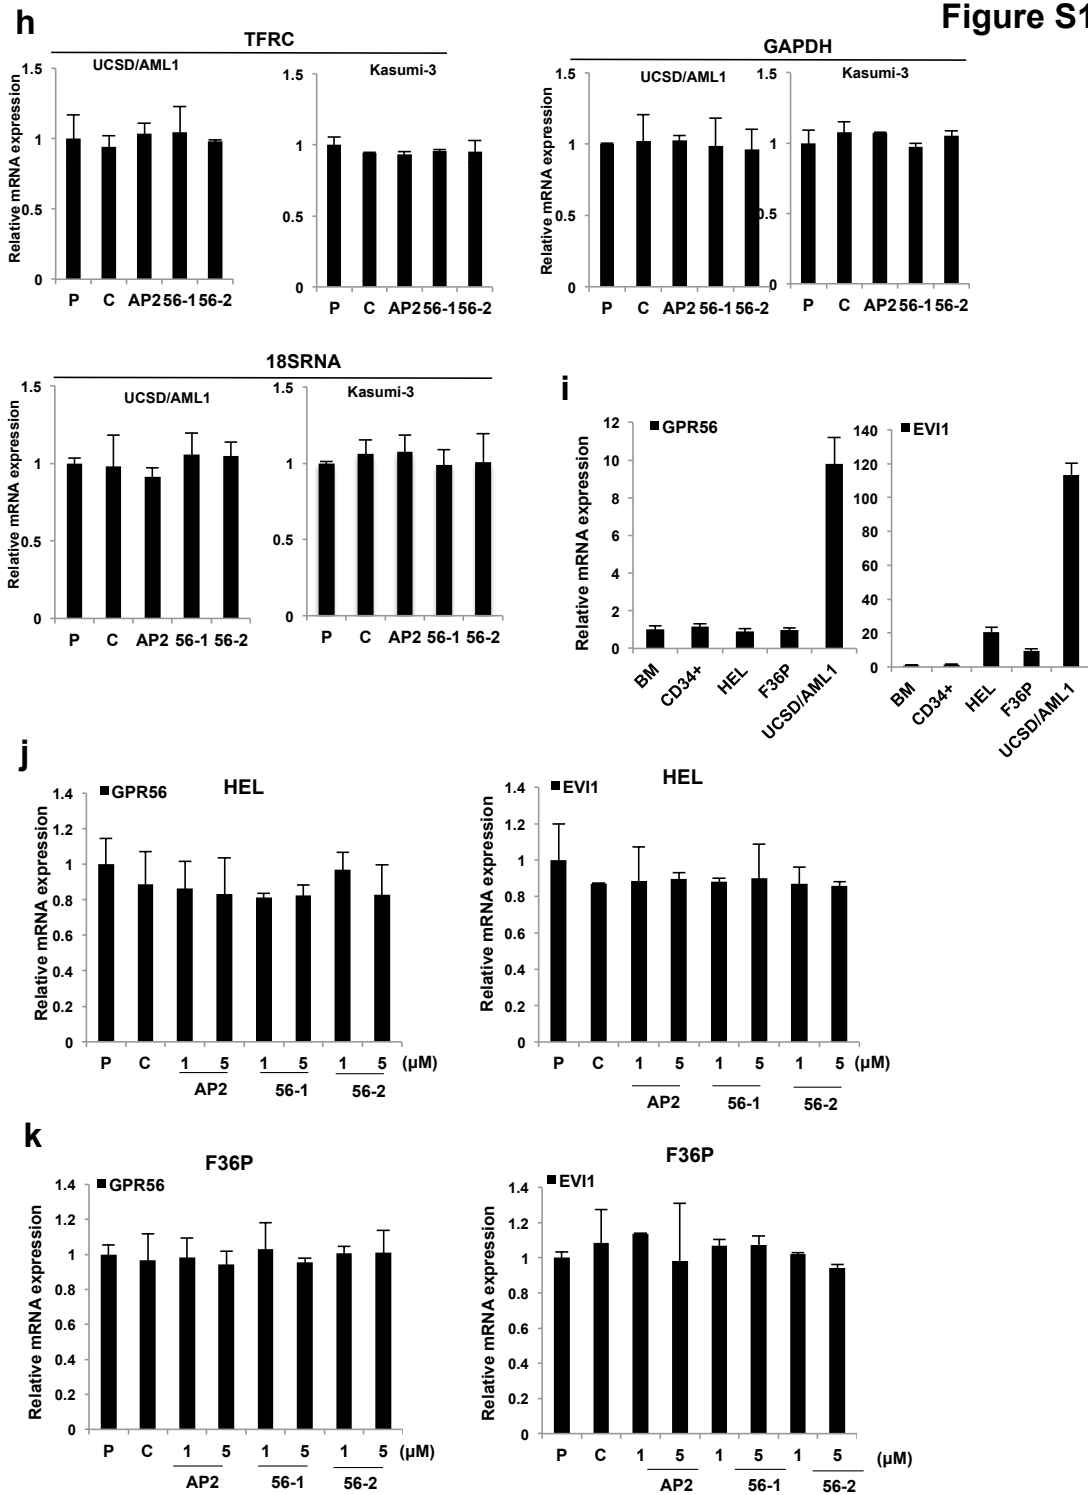

1

2

3 **Supplementary Figure 1. Suppression of GPR56 expression by the treatment with PIP/56-1 or**

4 **PIP/56-2 in AML cell lines.**

1 **(a,b)** Effects of various PIPs on the expression of GPR56 were determined by FCM. One or five  $\mu\text{M}$   
2 of PIPs (56-1, 56-2, or 56-1m) were used to treat UCSD/AML1 **(a)** or Kasumi-3 **(b)** cell lines. P,  
3 parental cells without any treatment; C, control solvent DMSO only for PIP.

4 **(c,d)** Expression of GPR56 determined by FCM analysis of UCSD/AML1 **(c)** and Kasumi-3 **(d)**  
5 under the same treatment conditions as in **Figure 1d** at 1 or 5  $\mu\text{M}$  doses. Bar graph shows relative  
6 MFI from corresponding FCM histogram plot of GPR56 (**Supplementary Fig. S1a,b**). Relative MFI  
7 was calculated by dividing MFI for cells stained with GPR56 (PE) Ab by MFI of the unstained  
8 control. P, parental cells without any treatment; C, control solvent (0.1% DMSO) for PIP. Data  
9 represent the mean  $\pm$  S.D. of three independent experiments and are presented relative to control  
10 (parental). \* $P < 0.05$  between parental control and treated cells (Student's  $t$ -test).

11 **(e)** Expression of *GPR56* mRNA was determined in the EVI1<sup>high</sup> AML (UCSD/AML1 and  
12 Kasumi-3) cells untreated (P) or treated with various PIPs (AP-2, N5, or C3) or control solvents (C)  
13 by real-time RT-PCR.

14 **(f)** Expression of GPR56 was determined in the EVI1<sup>high</sup> AML (UCSD/AML1 and Kasumi-3) cells  
15 untreated (P) or treated with various PIPs (AP-2, N5, or C3) or control solvents (C) by FCM. The  
16 gray line represents unstained cells.

17 **(g)** The bar graph shows the relative MFI from FCM analysis of **(S1d)**.

18 **(h)** UCSD/AML1 and Kasumi-3 cells were treated with 5  $\mu\text{M}$  of different PIPs (AP2, 56-1, or 56-2)  
19 or DMSO (C) for 24 hours, then expression of *MPL*, *ANGPT1*, *GATA2*, *RUNX1*, *CKMT1*, and  
20 *BCLXL* as EVI1-target genes, and *TFRC*, *GAPDH*, and *18srRNA* as EVI1 non-targeted genes was  
21 determined by quantitative RT-PCR analysis. Data are presented as mean  $\pm$ S.D. and relative to the  
22 parental cells with no treatment (P).

23 **(i)** Expression of *EVII* and *GPR56* was determined in three AML cell lines (HEL, F36-P, and  
24 UCSD/AML1) along with whole human bone marrow cells (BM) and CD34<sup>+</sup> bone marrow cells  
25 from healthy volunteers by quantitative RT-PCR analysis. Data were presented mean  $\pm$ S.D. relative  
26 to the expression level of *EVII* or *GPR56* in BM cells.

27 **(j,k)** Expression of *GPR56* and *EVII* was determined by quantitative RT-PCR in two EVI1<sup>low</sup> AML  
28 cell lines (HEL **(j)** and F36-P **(k)**), after treatment with 1 and 5  $\mu\text{M}$  of PIPs (AP2, 56-1, and 56-2) or  
29 solvent DMSO only (C) for 24 hours and data presented as mean  $\pm$ S.D. and relative to the expression  
30 level of parental cells (P).

31

32

Figure S2

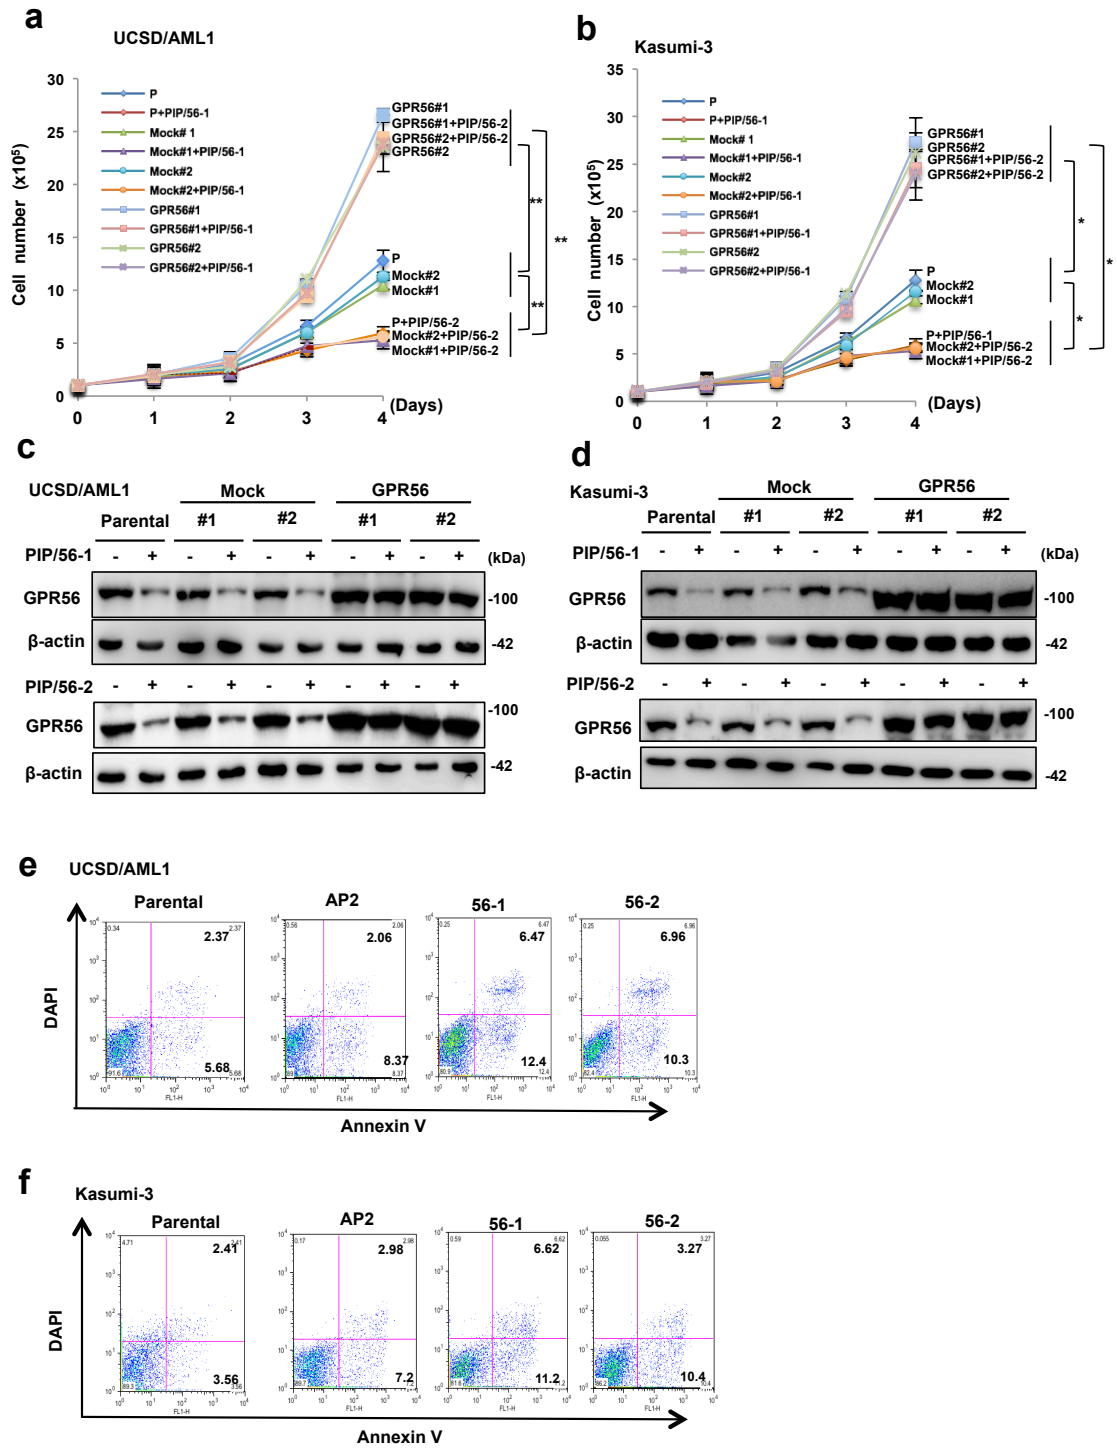

Figure S2

g

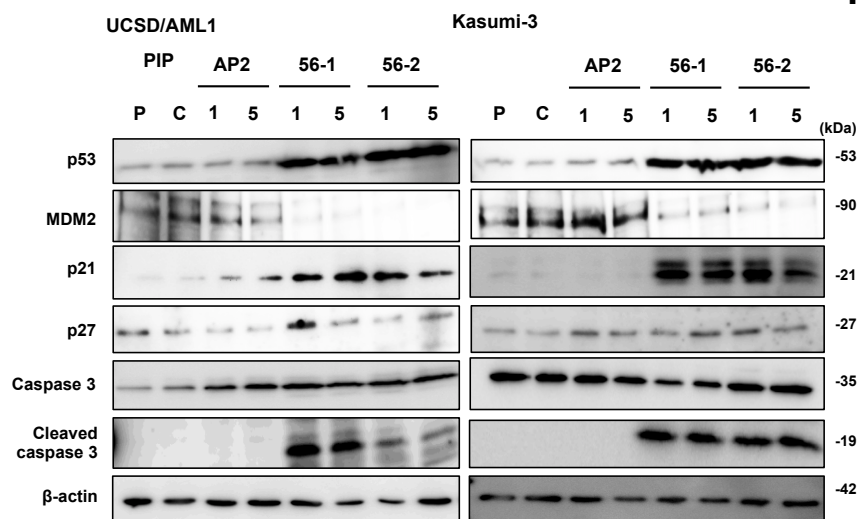

h

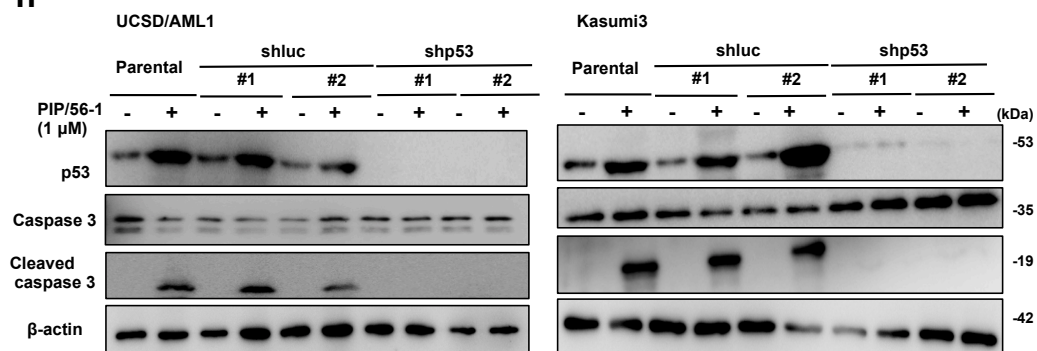

Figure S2

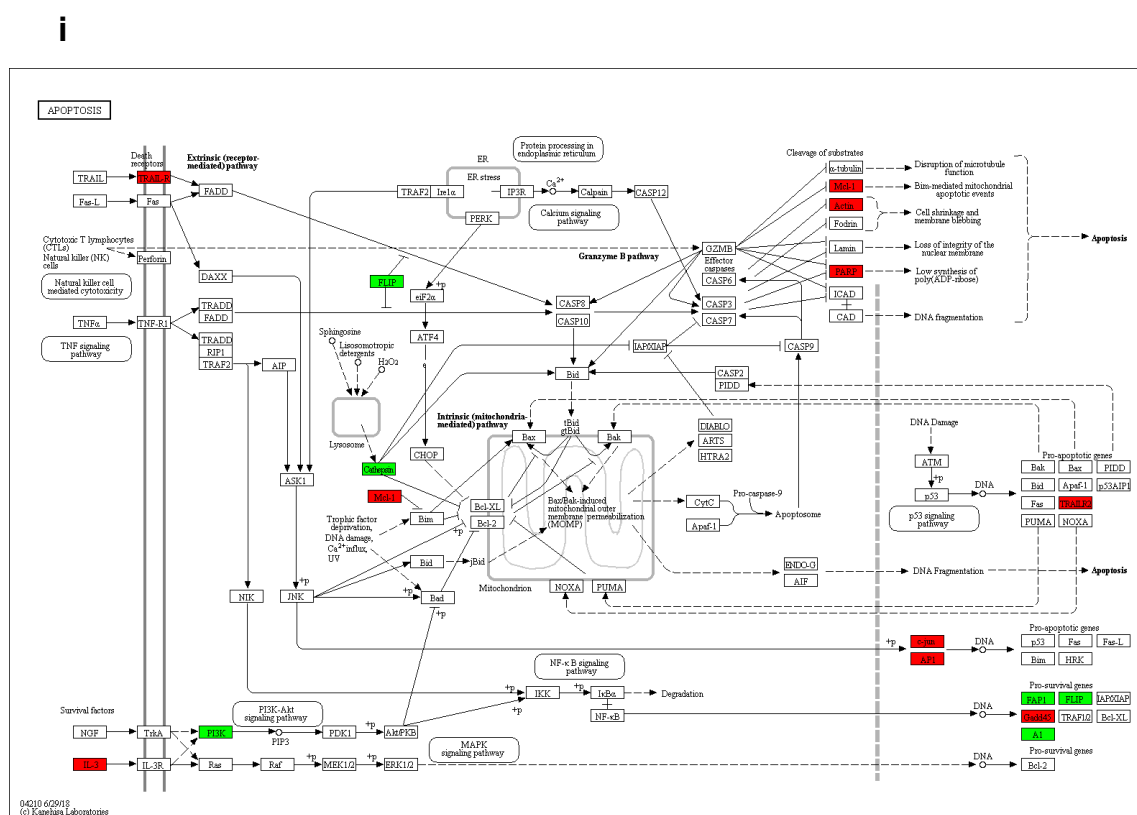

1

2 **Supplementary Figure 2. Treatment of PIP/56-1 or PIP/56-2 suppresses cell growth via the**  
 3 **induction of apoptosis in two EVI1<sup>high</sup> AML cell lines.**

4 **(a,b)** UCSD /AML1 and Kasumi-3 were treated with 1 μM of PIP/56-2 for 24 hours and the treated  
 5 cells were transfected in duplicate with the GPR56 expression vector (#1 and #2) or the empty vector  
 6 (#1 and #2). Cell proliferation rates were determined by the trypan blue staining. The data represent  
 7 the means ± S.D of triplicate determinations. \**P* < 0.05, \*\* *P* < 0.01 (Student's *t*-test).

8 **(c,d)** Western blot analysis of GPR56 was performed on UCSD/AML1 and Kasumi-3 that were  
 9 untreated or treated with PIP/56-1 or PIP/56-2 and transfected with the GPR56 expression vector or  
 10 the mock vector. β-actin was used as a loading control.

11 **(e,f)** After three days of PIP treatment (AP2, 56-1, or 56-2), apoptotic cells were determined by FCM  
 12 analysis using Annexin V-FITC and DAPI double staining in the two EVI1<sup>high</sup> AML cell lines  
 13 UCSD/AML1 (e) and Kasumi-3 (f).

1 (g) Western blot analysis of p53-related apoptotic signaling in two AML cell lines (UCSD/AML1  
2 and Kasumi-3) under the same conditions as in **Figure 3a** with the indicated antibodies.

3 (h) Western blot analysis of p53, caspase 3, cleaved caspase 3 in UCSD/AML1 and Kasumi-3 was  
4 performed after transfection of the shp53 or shLuc vector in duplicate under 1  $\mu$ M PIP/56-1  
5 treatment.  $\beta$ -actin was used as a loading control.

6 (i) Kyoto encyclopedia of genes and genomes (KEGG) apoptosis pathway (hsa04210)  
7 ([www.kegg.jp/kegg/kegg1.html](http://www.kegg.jp/kegg/kegg1.html))<sup>5</sup>. KEGG pathway analysis was performed using microarray data  
8 from UCSD/AML1 cells with and without PIP/56-1 treatment. Genes that are shown in the red boxes  
9 are upregulated and those in green boxes are downregulated in PIP/56-1-treated UCSD/AML1 cells.

10  
11  
12  
13  
14  
15  
16

Figure S3

**a**

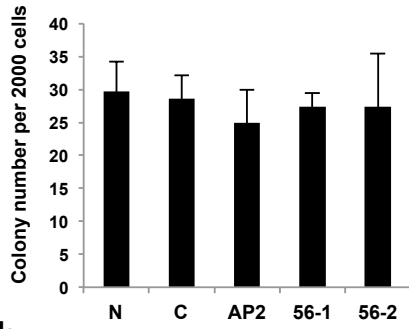

**b**

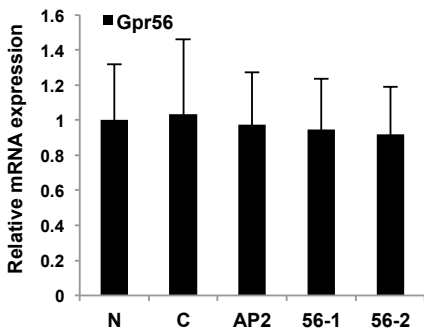

**c**

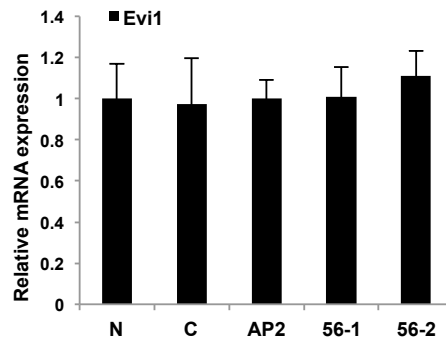

**d**

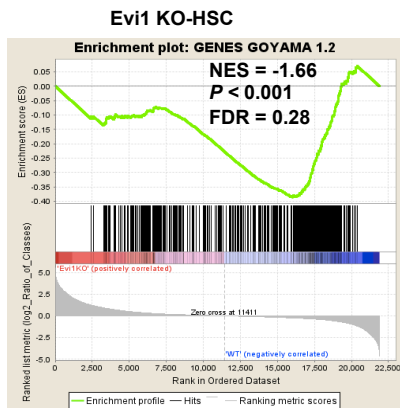

**e**

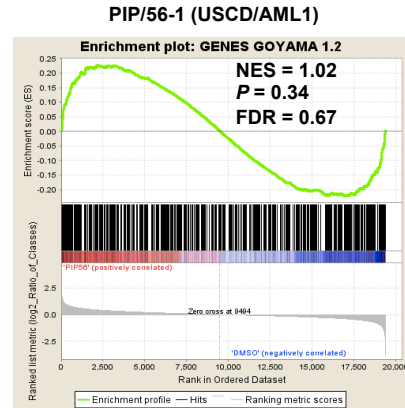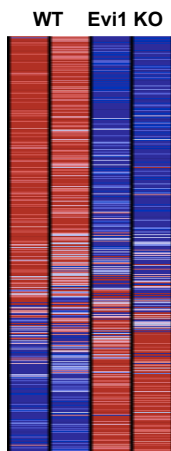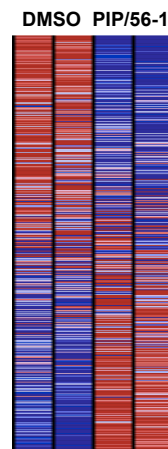

1  
2

1 **Supplementary Figure S3. *In vitro* effects of PIPs on murine HSCs.**

2 **(a)** *In vitro* colony formation assay from c-kit<sup>+</sup> murine HSCs with no treatment (N), solvent (DMSO)  
3 treated (C) and treated with various PIPs (AP2, 56-1, or 56-2) at 1 μM. The average total number of  
4 colony is presented mean ±S.D., from three mice (n=3).

5 **(b,c)** Murine c-kit<sup>+</sup> HSCs were treated with 1 μM of each PIPs (AP2, 56-1, or 56-2) or DMSO only  
6 (C) for 24 hours and expression of *Gpr56* **(b)** and *Evi1* **(c)** were determined by real time RT-PCR.  
7 Data presented mean ±S.D. and relative to the expression of no treatment (N) cells (n=3).

8 **(d,e)** Microarray data for PIP/56-1-treated UCSD/AML1 cells were analyzed using gene set  
9 enrichment analysis (GSEA) (<http://software.broadinstitute.org/gsea/index.jsp>) to determine gene  
10 expression changes in a set of genes previously reported to be regulated by *Evi1* expression in HSCs<sup>6</sup>.  
11 GSEA analysis was also performed using microarray data from HSCs of *Evi1*-knockout (KO) mice  
12 (GSE11557)<sup>6</sup>. The figures show the enrichment plot using a gene set for *Evi1*-regulated genes in  
13 HSCs between wild-type HSCs versus HSCs from *Evi1*-knockout mice **(d)** and PIP/56-1-treated  
14 versus solvent 0.1% DMSO-treated UCSD/AML1 cells **(e)**. Normalized enrichment score (NES),  
15 nominal p-values and false discovery rate (FDR) are indicated. The heatmap on the bottom shows  
16 where gene expression is relatively high (red) or low (blue) for each gene in the indicated sample.

17

18

19

20

21

22

23

24

25

26

27

28

29

30

31



Figure S4

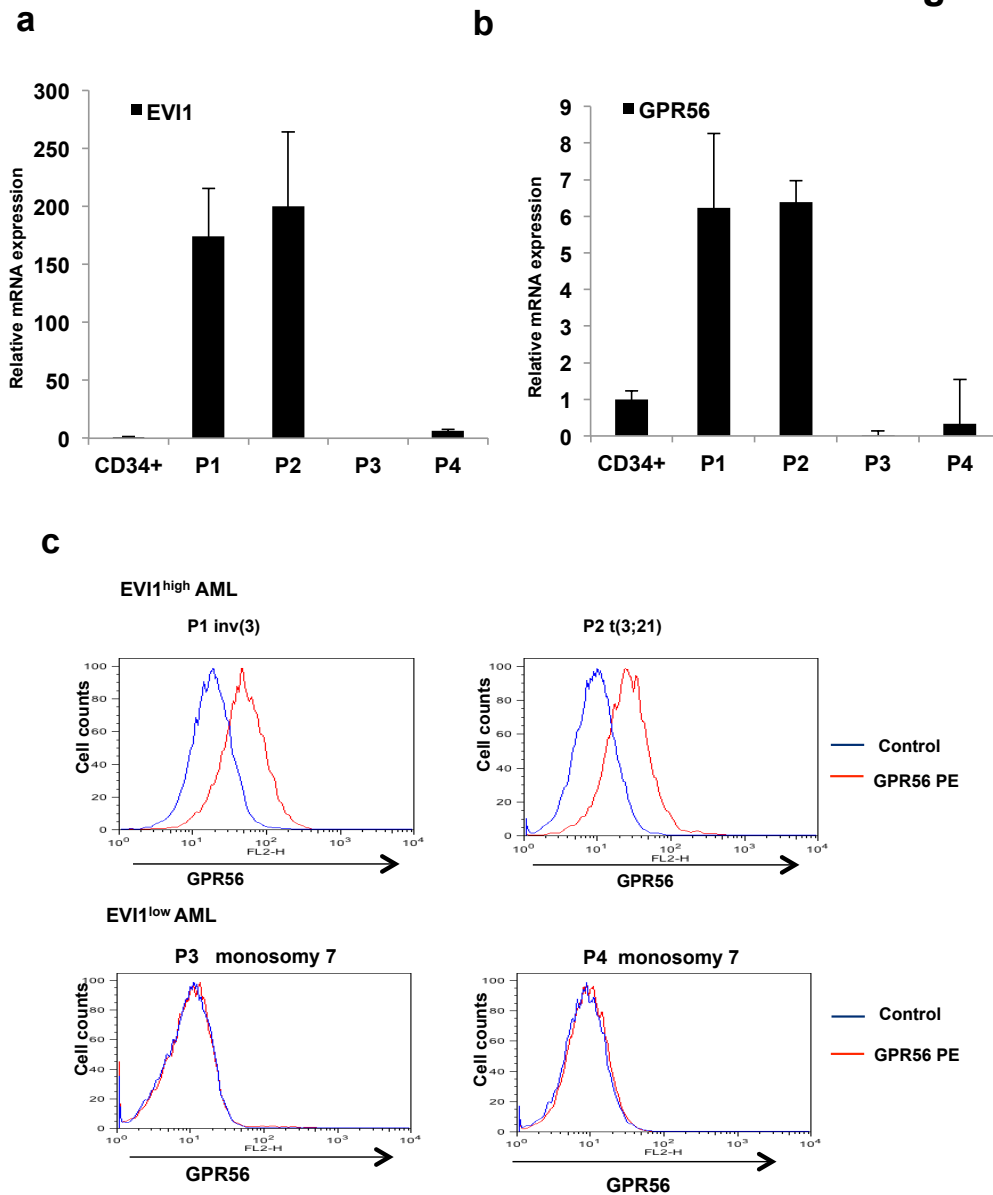

1

2 **Supplementary Figure 4. Expression of EVI1 and GPR56 in primary AML cells with or**  
3 **without chromosome 3 abnormalities by quantitative RT-PCR and FCM analysis.**

4 **(a,b)** Expression of *EVI1* **(a)** and *GPR56* **(b)** was determined by real-time RT-PCR in primary  
5 leukemia cells from four AML patients with inv(3) (P1), t(3;21) (P2), or monosomy 7 (P3 and P4)  
6 with CD34<sup>+</sup> BM cells as a control.

7 **(c)** Expression of GPR56 was determined by FCM analysis using PE-labelled anti-GPR56 antibody  
8 in the same four leukemia cell samples in **(a)**.

9

10

11

1 **Supplementary Figure 5. Original gels and blots.**

2

**Fig. 2a**

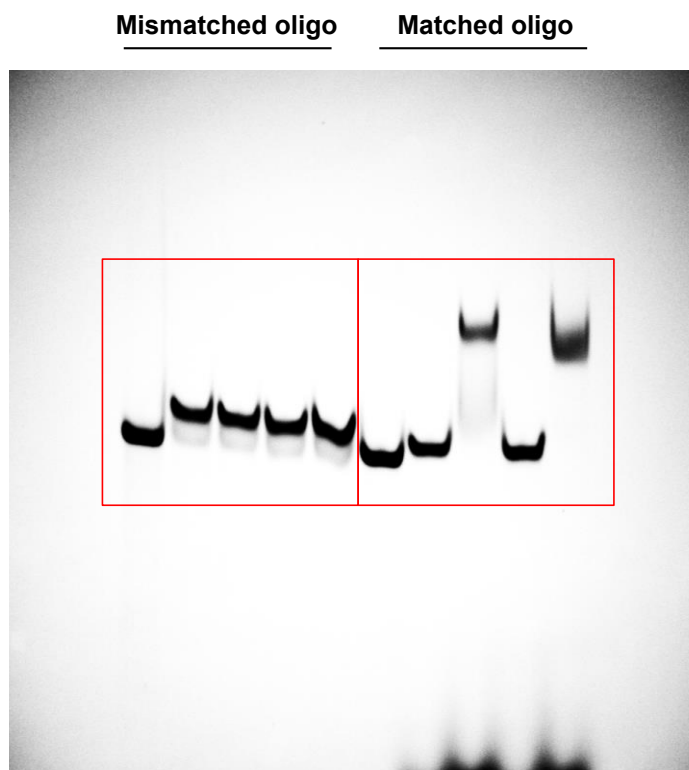

3

Fig. 2c

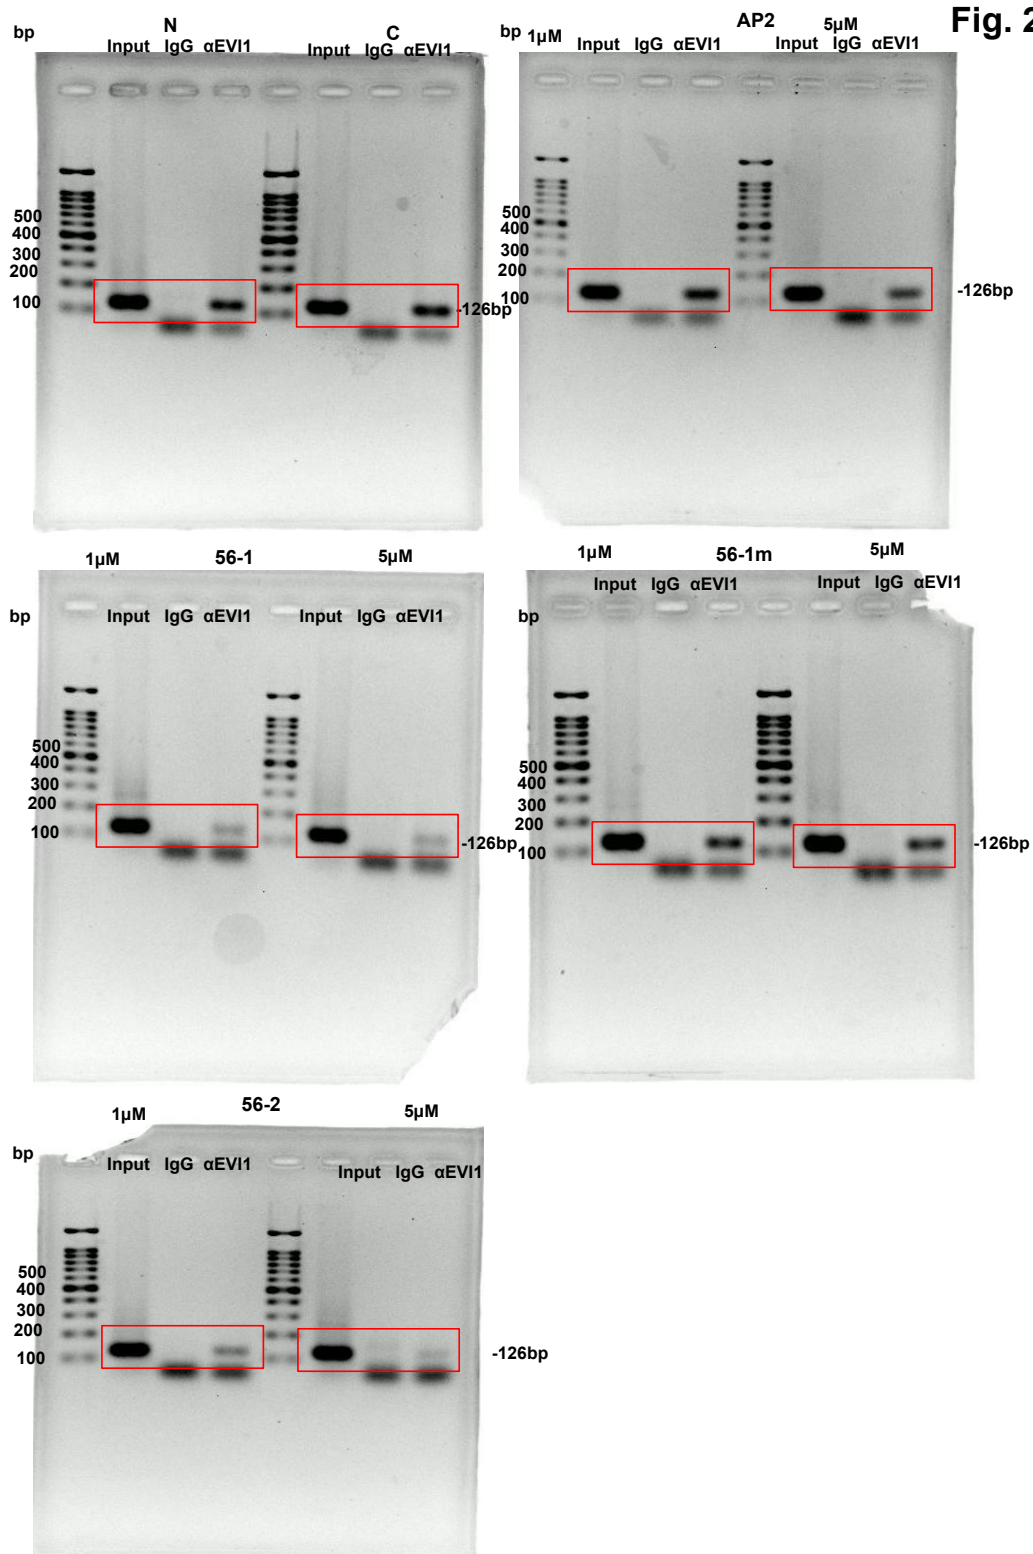

Fig. 3e

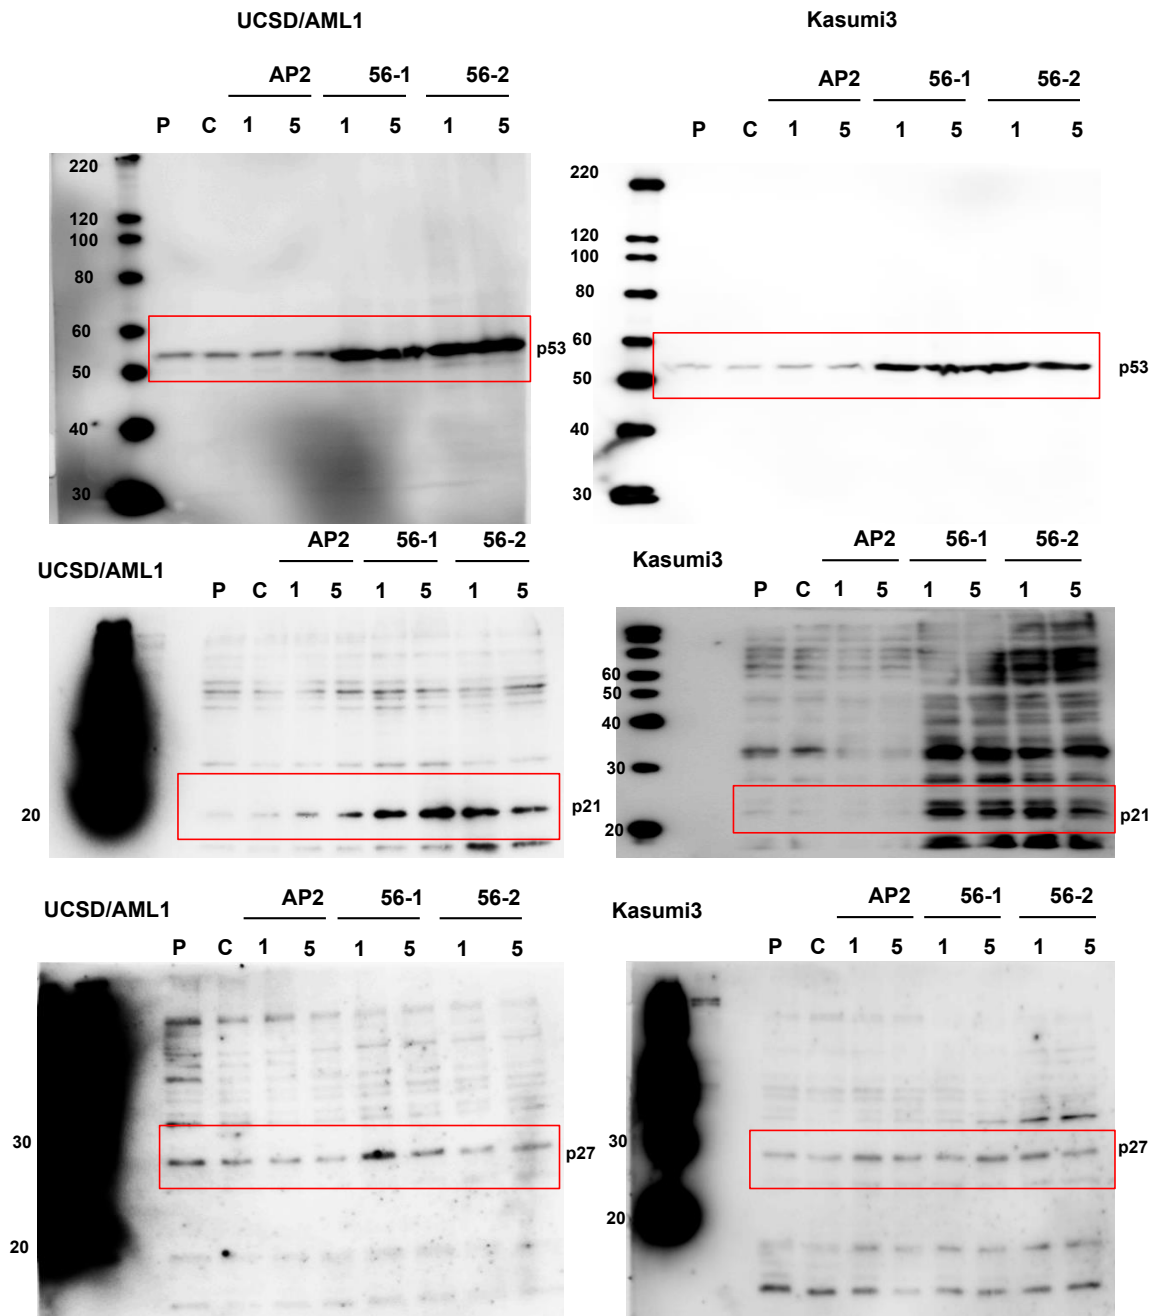

Fig. 3e

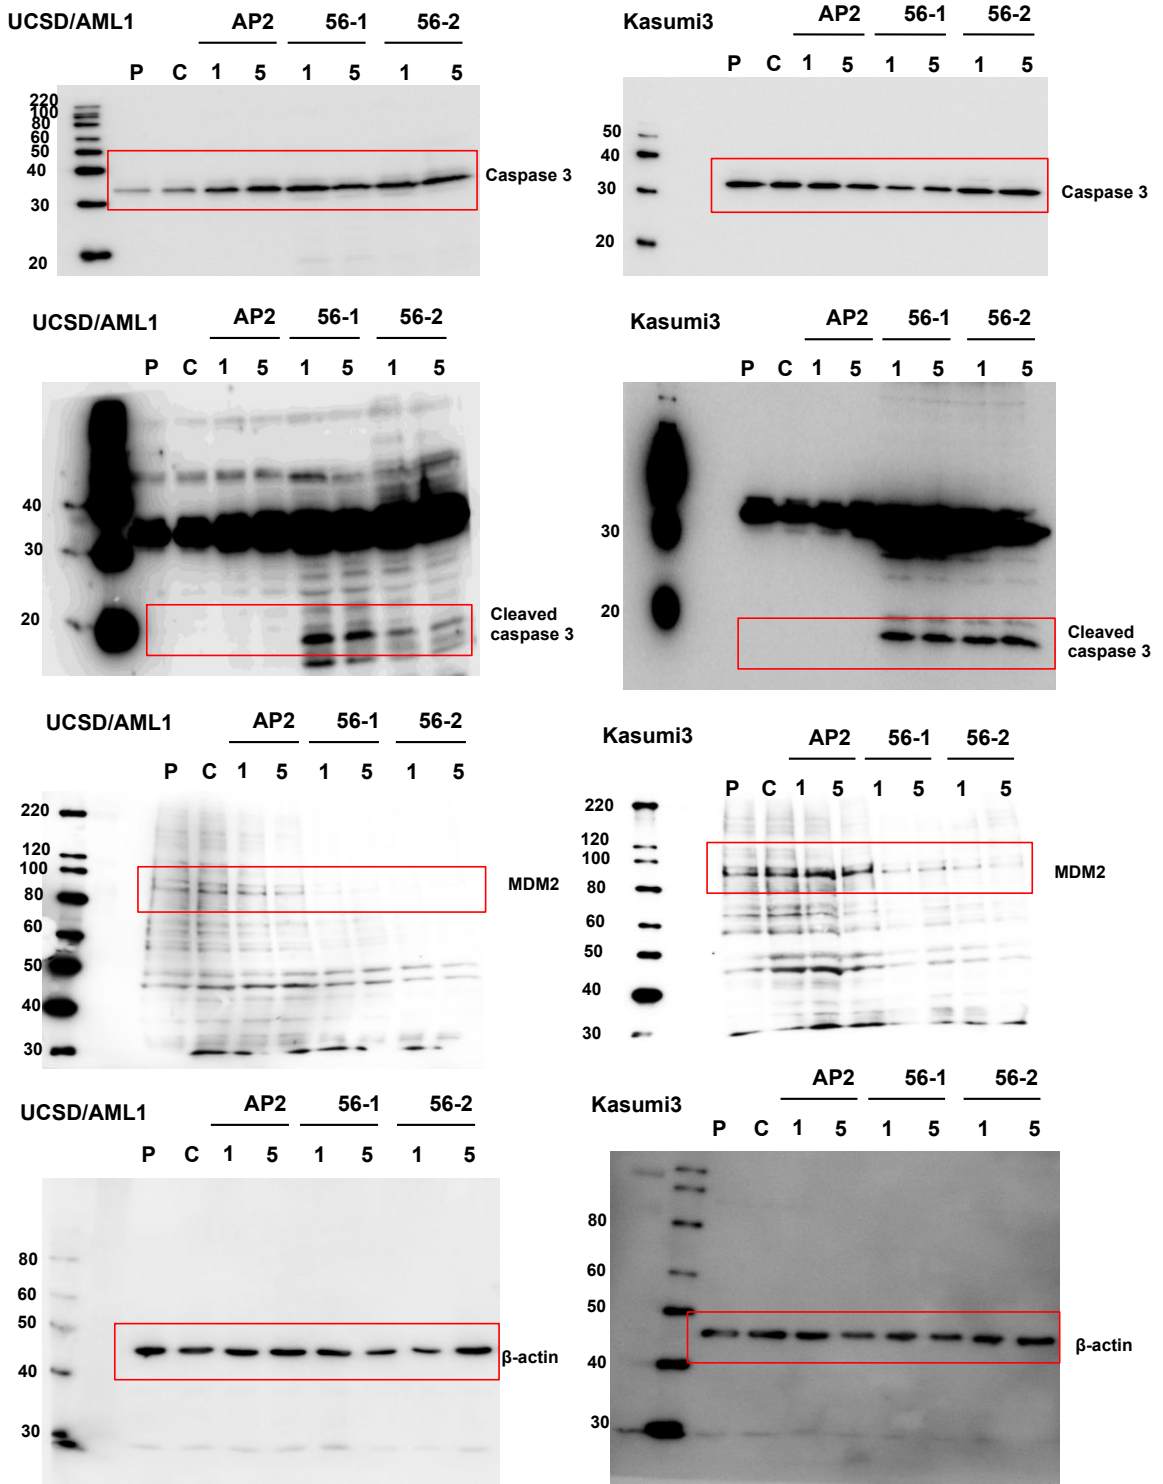

**Fig. S2c**

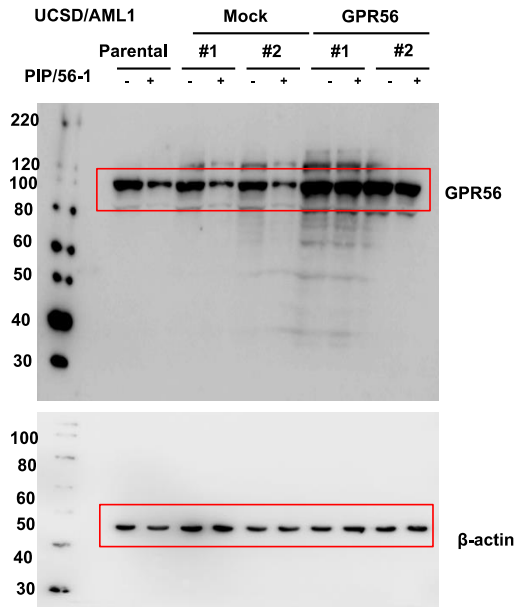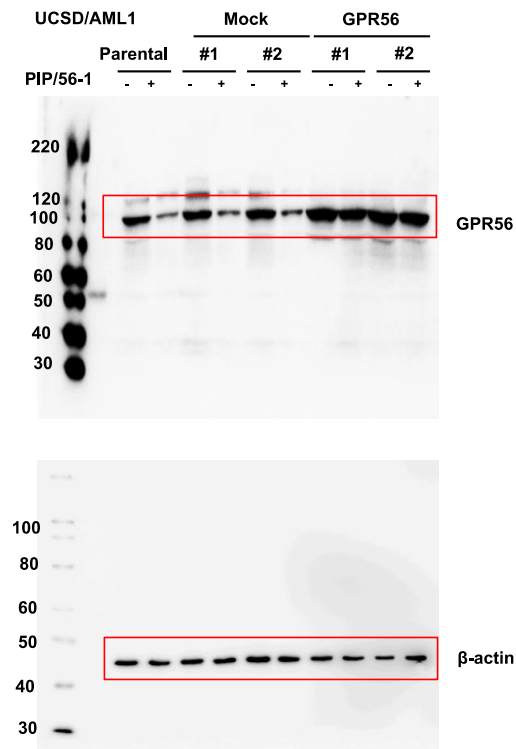

**Fig. S2d**

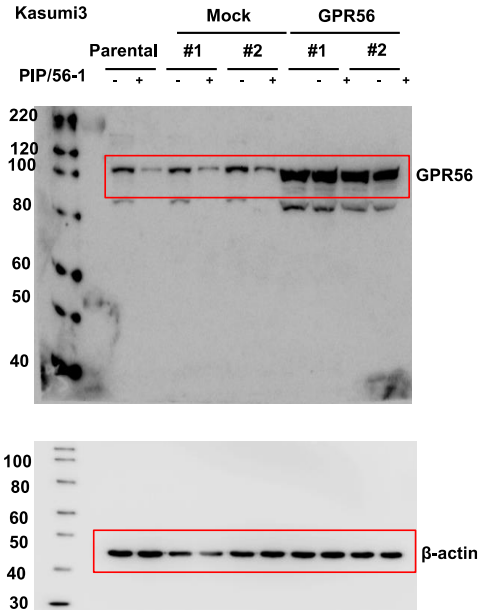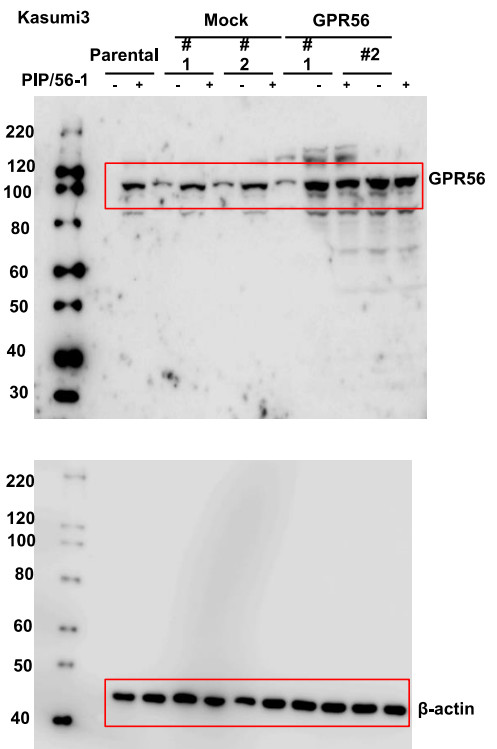

Fig. S2g

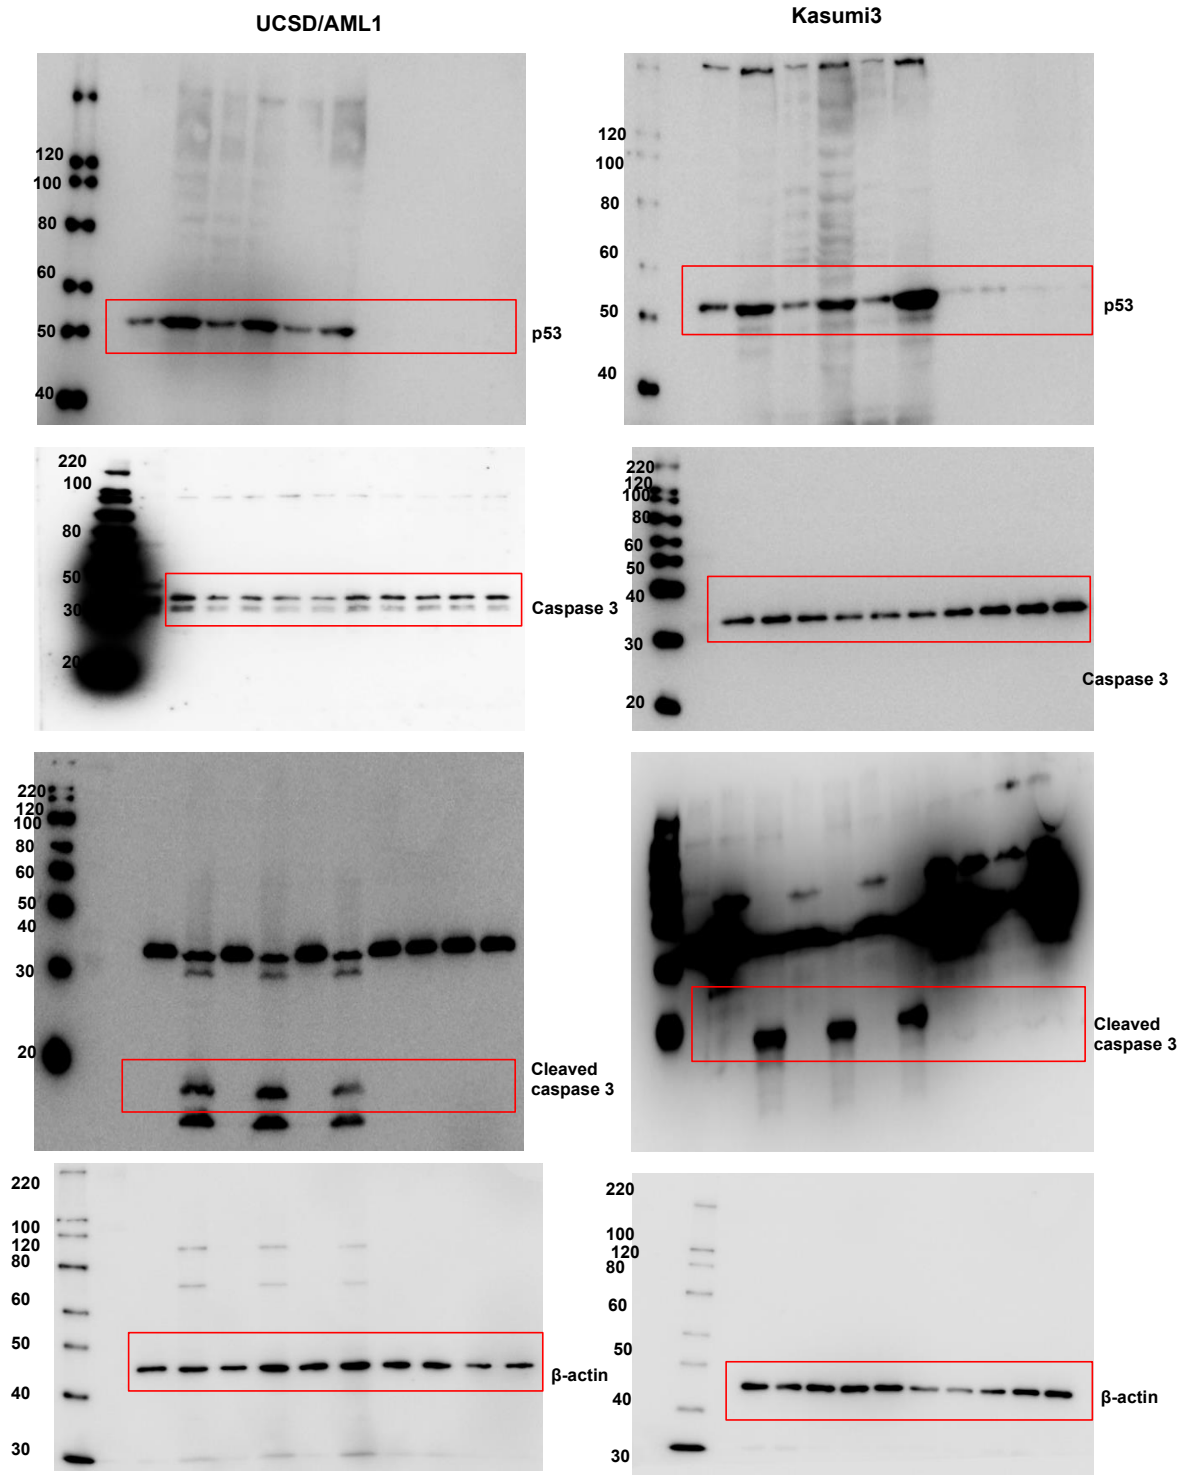

1

## 2 **Supplementary References**

31) Saito, Y. *et al.* Maintenance of the hematopoietic stem cell pool in bone marrow niches by  
4 EVI1-regulated GPR56. *Leukemia* **27**,1637-49 (2013).

52) Saito, Y. *et al.* CD52 as a molecular target for immunotherapy to treat acute myeloid leukemia with  
6 high EVI1 expression. *Leukemia* **25**, 921-31 (2011).

73) Iguchi, T., Sakata, K., Yoshizaki, K., Tago, K., Mizuno, N. & Itoh, H. Orphan G protein-coupled  
8 receptor GPR56 regulates neural progenitor cell migration via a G alpha 12/13 and Rho pathway. *J*  
9 *Biol Chem.* **283**, 14469-78 (2008).

104) N. Manachai *et al.* Activation of EVI1 transcription by the LEF1/b-catenin complex with  
11 p53-alteration in myeloid blast crisis of chronic myeloid leukemia. *BBRC.* **484**, 994-1000 (2017).

125) Kanehisa, M., Furumichi, M., Tanabe, M., Sato, Y. & Morishima K. KEGG: new perspectives on  
13 genomes, pathways, diseases and drugs. *Nucleic Acids Res.* **45**,D353-D361 (2017).

146) Goyama, S. *et al.* Evi-1 is a critical regulator for hematopoietic stem cells and transformed leukemic  
15 cells. *Cell Stem Cell* **3**, 207–220 (2008).

16

17

18
